# Supplementary material for: 3D multimodal histological atlas and coordinate framework for the mouse brain and head
Source: Research Square preprint supplement (doi:10.21203/rs.3.rs-6387518/v1), 2025-05-14
Supplement: Supplementary file 1 [file 096a78bc37b18917207a87ad.docx]

**Supplementary Methods**.

*MRI & CT (Radiology)*.

In addition to the in vivo and ex vivo data acquired at NYU, extra CT and MRI scans were acquired at NIH:

*Ex vivo* CT (NIH): CT images of mouse heads *ex vivo* were acquired using a Quantum GX MicroCT scanner (Perkin Elmer, Hopkinton, MA, USA) in the Mouse Imaging Facility at NIH (MIF). Image acquisition time was 14 minutes per sample for nominal isotropic resolution of 32 µm.

*Ex vivo* MRI (NIH): A vertical bore 14.1 Tesla Microimaging scanner (Bruker Biospin, Billerica, MA) in the NIH MIF was used. The scan protocol included a low resolution 2D FLASH pilot, TE/TR=1.5/120 ms, Resolution = 0.156x0.156 mm2, Scan time = 23 s, and a high-resolution 3D FLASH TE/TR=8/30 ms, 2 averages, Resolution = 0.05x0.05x0.05 mm3, Scan time = 1 h 40 m.

For *in vivo* and *ex vivo* imaging, an 11.7 Tesla animal MRI system (30 cm horizontal bore magnet, Magnex Scientific, Oxford, England; MRI Electronics, Bruker Biospin, Billerica, MA) with a 12-cm integrated gradient shim system (Resonance Research Inc, Billerica, MA) was used. Animals were initially anesthetized with 3% isoflurane in 40% O2 mixed high-flow compressed air delivered at 1.5 L/min and maintained at 1% isoflurane concentration for the duration of imaging. Imaging was performed using a four-channel phased array cryogenically cooled receive-only coil with a volume transmit coil (CryoProbe system, Bruker). The scan protocol included a low resolution 2D FLASH (TE/TR=2.3/40 ms, Resolution = 0.156x0.156 mm2, Scan time = 1 m, 40 s) and a high resolution 3D FLASH (TE/TR=4.65/30 ms, 2 averages, Resolution = 0.05x0.05x0.05 mm3, Scan time = 43 m). The *ex vivo* scan protocol included the same low-resolution 2D FLASH, two repetitions of the high-resolution 3D FLASH, and an additional low-resolution 3D FLASH (TE/TR=4.65/30 ms, 2 averages, Resolution = 0.08x0.08x0.08 mm3, Scan time = 18 m).

*Histology & Microscopy*.

*Mouse colony & facilities*. All animals at CSHL were acquired from Jackson Laboratories (stock 000664) under IRB protocol #498813-18 according to protocols approved by the Animal Care and Use Committee at Cold Spring Harbor Laboratory. The animals were 56 ± 3-day-old, C5BL/6J mice, with weights ranging from 18.8 to 26.4 g. Additionally, twelve C57BL/6 mice (6 males and 6 females) were imaged at P56 and sacrificed at P56. All experimental procedures were approved by the Animal Use and Care Committee at the New York University Grossman School of Medicine.

*Perfusion, fixation and brain extraction*. The animals were sacrificed on postnatal day (P)56, and after any *in vivo* imaging experiments, by deep anesthetization with isoflurane and Avertine (2.5%). Perfusion pressure was maintained at 130 mm Hg with a Masterflex L/S Economy Pump System (Cole-Parmer, Vernon Hills, IL). The animals were perfused with 4% paraformaldehyde (PFA) (JT Baker, #JTS898-7) through the heart, after a 50 mL saline pre-flush to remove blood from the circuit. After perfusion, the animals were decapitated posterior to the first cervical vertebrae. Before imaging, the brains were stored in PBS, as well as after imaging. Heads were submerged in fomblin immediately before *ex vivo* imaging. The current imaging protocol was approximately 10-17 hours for a T1-weighted image.

*Decalcification*. After imaging, the skulls were placed in a recirculation chamber for all wash and cryoprotection steps. The skulls were washed with 20% EDTA (Sigma Aldrich, ED4S) for 72 hours, followed by dH2O for 5h, and 1x PBS for 1 hour.

*Cryoprotection and freezing*. The skulls were post-fixed for 24 hours in a solution of 4% PFA with 10% sucrose (JT Baker, #4072-05), followed by 24 hours in a solution of 4% PFA with 20% sucrose, and another 24 hours in a solution of 4% PFA with 30% sucrose. Embedding in freezing agent (Neg-50, Thermo Scientific 6505 Richard-Allan Scientific) was done using a custom-developed apparatus and a negative cast mold of the block profile for each brain. The apparatus was submerged in an optimal cutting temperature compound to expedite the freezing process.

*Cryosectioning*. Cryosectioning of the frozen skull blocks was performed using the Microm HM550 and CryoStar NX-50 in a temperature- and humidity-controlled chamber set between -16 to -20 C and 20% to 60% humidity, with the cryostat specimen head temperature set at -16 C. The cryosectioning was conducted in a temperature- and humidity-controlled room set at 18 C and 60% humidity. The skulls were coronally cryosectioned at 10 um with alternating sections using the tape transfer method [7](https://www.zotero.org/google-docs/?QvKRPs). Each section was placed onto a 1”x 3” StarFrost slide first coated with Solution B adhesive. Once the appropriate amount of sections were placed onto a slide, the slides were then exposed to UV light for 8 seconds inside the cryo-chamber to cure the tissue onto the slide. The cured slides were then placed into an appropriately sized slide box and then stored at 4 C for 24 hours before starting the staining procedures.

*Histological Staining*. Separate histological staining processes were performed on different series of brain sections. High-throughput Nissl tissue staining was conducted in an automated staining machine (Sakura Tissue-Tek Prisma, DRS-Prisma-J0S). The slides underwent an automated Nissl staining protocol starting with a thionin solution: 1.88 g thionin chloride (TCI, T0214) in 750 mL deionized water (DiH2O), 9 mL glacial acetic acid (WAKO, 012–00245), and 1.08 g sodium hydroxide pellets (Sigma-Aldrich, 221465). The slides were washed three times with DiH2O, dehydrated in increasing concentrations of ethanol (50%, 70%, 95%–100%), and finally treated with xylene. The slides were then automatically cover-slipped (Sakura Tissue-tek Glas2-g2-S0) and left to dry for 24 hours.

The myelin staining technique used a modified silver stain originally developed by Gallyas [8](https://www.zotero.org/google-docs/?P8EfjY). The protocol was applied to the slide-mounted sections. The slides were incubated in a mix of pyridine and acetic anhydride for 35 minutes, followed by washes with DiH2O, 50% EtOH, 30% EtOH, and increasing concentrations of acetic acid. The slides were immersed in a silver nitrate solution for 35 min, followed by a wash with 0.5% acetic acid. The slides were developed using a mix of solutions: Developer A (Sodium carbonate), Developer B (Ammonium nitrate, Silver nitrate, Tungstosicilic Acid), Developer C (Ammonium nitrate, Silver nitrate, Tungstosicilic Acid 37%, Formaldehyde). The slides were washed in three consecutive washes with 0.5% acetic acid, placed on a drying rack for 24 hours, dehydrated with graded ethanol solutions, followed by automatic cover-slipping with DPX (Sigma-Aldrich). After the physical development of the myelin stain, the tissue was manually inspected for staining and morphological quality.

*Neurohistological image series acquisition*. All the prepared slides were scanned by series using a Nanozoomer 2.0 HT (Hamamatsu, Japan) with a 20x objective (0.46 μm/pixel in plane) at 8-bit depth by 3 channels and saved in an uncompressed RAW format. Imaging data were collected from the Nanozoomer and automatically transferred to a data acquisition system, which serves as the central repository for image pre-processing, including image cropping, conversion, and compression, using custom-built code in C and Matlab.

*Quality Control*. The quality control (QC) service was applied at all stages of experimentation and image data flow to correct and improve the pipeline process organically. The experimental pipeline process information was recorded in an internal Laboratory Information Management System (LIMS), which supported the workflow by recording the detailed status of each experimental stage for each brain. Similarly, a separate online QC portal managed all image pre-processing stages. Through the LIMS and QC portal, damaged sections were flagged to avoid unnecessary post-processing, and the need to repeat specific processing stages was identified.
