# Supplementary material for: 3D multimodal histological atlas and coordinate framework for the mouse brain and head
Source: Research Square preprint supplement (doi:10.21203/rs.3.rs-6387518/v1), 2025-05-14
Supplement: Supplementary file 2 [file 5f77e52c340757a76ed2885f.docx]

**Segmented volume ID Reassignment and Integer Precision Remapping**

Brain region segmented volumes used in the BAP mouse head RAF originate from version 3 of the AIBS (Dong, et al, 2020) mouse atlas. Despite having a set of approximately 700 unique region IDs, integer ID values span a range up to 2^31 in these segmented volumes, necessitating a bit precision of uint32 (32-bit unsigned integers). Additionally, homologous regions in the left and right hemispheres are not separated in the original AIBS volume (Dong, et al., 2020). To generate a unique set of region IDs for the right hemisphere and avoid conflicts with existing IDs, values equal to or greater than 2^31 were used, requiring a bit precision in the segmented volume file of uint64 (64-bit unsigned integers). This is undesirable for several reasons, including unnecessarily large file sizes and a lack of interpretability by standard segmented volume viewing packages, such as ITK-Snap (cite). Therefore, we regenerated all region IDs for the left hemisphere to range from 1 to 700 and added 2^13 to each homologous region’s ID in the right hemisphere. This allowed us to reduce file size by approximately 2 orders of magnitude and ensure interpretability by standard volume viewing packages by saving the volumes with a uint16 bit precision (16-bit unsigned integer format).

**Segmented Volume Bubble Correction**

Brain region segmented volumes used in the BAP mouse head RAF originate from version 3 of the AIBS (Dong, et al, 2020) mouse atlas. Due to registration and interpolation artifacts, these volumes contain bubbles – isolated singular or small sets of voxels with region IDs that do not match their neighbors. We corrected these bubbles to eliminate artifactual isolated region ID assignment to voxels. First, we defined continuity of region IDs as voxels with the same ID assignment having touching faces. We set a threshold of five or fewer continuous voxels with the same ID assignment to constitute a bubble, or isolated set. We then identified all bubbles for each region ID and reassigned each voxel in each bubble to the same ID as the majority of its neighboring voxels not within the bubble, following a principle similar to nearest neighbor interpolation. This process was repeated until all voxels within all bubbles are reassigned. Any lingering bubbles missed by the heuristic algorithm were hand-corrected using Blender3D. This heuristic algorithm corrected approximately 99.5% of all voxels within bubbles, reducing the number of bubbles from almost 28,000 to just over 150 – a reduction of over 2 orders of magnitude. The MATLAB package for generating these volumes and the annotation volumes themselves are made available through https://data.brainarchitecture.org/pages/mouse.
