# Supplementary material for: 3D multimodal histological atlas and coordinate framework for the mouse brain and head
Source: Research Square preprint supplement (doi:10.21203/rs.3.rs-6387518/v1), 2025-05-14
Supplement: Supplementary file 3 [file 603eb3a416daca11b2dd28a0.docx]

**Supplemental section S4: MRI microgeometry parameter maps**

The MD, FA, and MK maps reported in the main text illustrate typical tissue contrasts from diffusion MRI data of the mouse brain. Additional diffusion MRI parameter maps (**Extended Data Figure 2**) provide a more detailed breakdown of diffusivity and kurtosis measurements along axial and radial directions, offering specific insights into axonal and myelin injury in mouse models of neurological disorders1. Axial and radial directions are defined along or perpendicular to axonal bundles in white matter tracts, although these definitions become less precise in gray matter regions.

In the *in vivo* mouse brain, AD values of large white matter tracts (e.g., the corpus callosum) are higher than those in gray matter regions (e.g., the cortex), but this contrast diminishes in the *ex vivo* mouse brain. RD values of large white matter tracts are lower than those in gray matter in both *in vivo* and *ex vivo* conditions. AK and RK values in white matter tracts are higher than those in gray matter regions, with the most distinct contrasts observed in the *ex vivo* mouse brain. Overall changes in these parameters are shown using voxel-wise scatter plots in **Extended Data Figure 3**.

Beyond the empirical diffusion tensor and kurtosis models, which lack specificity to specific tissue microstructure, we incorporated parameters from a biophysical model of tissue microstructure2. In this and similar models3,4, axons are represented by long, impermeable cylinders and cell bodies by spheres. Some properties of the spatial organization of these cellular compartments can be inferred from diffusion MRI signals based on their distinct restrictive effects on water molecule diffusion. These parameters include axonal fraction (*f*), fraction of isotropic diffusion compartment (*fiso*), fiber dispersion (*p2*), intra-axonal axial diffusivity (*Da*), extracellular axial diffusivity (*De||*), and extracellular radial diffusivity (*De^*). **Extended Data Figure 2B** shows representative maps of these parameters.

In the map of *f*, the difference between gray and white matter regions is more pronounced in the *ex vivo* mouse brain compared to the *in vivo* mouse brain. *fiso* is higher in the *ex vivo* corpus callosum than *in vivo.* Maps of *p2* show an increase in the *ex vivo* mouse brain in gray matter regions compared to the *in vivo* state*.* Changes in *Da*, *De||*, and *De^* follow the same patterns as observed in the maps of AD and RD.  Overall changes in these parameters are shown using voxel-wise scatter plots in **Extended Data Figure 4**.

1. Song, S.-K. *et al.* Diffusion tensor imaging detects and differentiates axon and myelin degeneration in mouse optic nerve after retinal ischemia. *NeuroImage* **20**, 1714–1722 (2003).

2. Novikov, D. S., Fieremans, E., Jespersen, S. N. & Kiselev, V. G. Quantifying brain microstructure with diffusion MRI: Theory and parameter estimation. *NMR Biomed.* **32**, e3998 (2019).

3. Palombo, M. *et al.* SANDI: A compartment-based model for non-invasive apparent soma and neurite imaging by diffusion MRI. *NeuroImage* **215**, 116835 (2020).

4. Zhang, H., Schneider, T., Wheeler-Kingshott, C. A. & Alexander, D. C. NODDI: practical in vivo neurite orientation dispersion and density imaging of the human brain. *NeuroImage* **61**, 1000–1016 (2012).
