# Supplementary material for: 3D multimodal histological atlas and coordinate framework for the mouse brain and head
Source: Research Square preprint supplement (doi:10.21203/rs.3.rs-6387518/v1), 2025-05-14
Supplement: Supplementary file 4 [file 6b6e206d946513c3e98c98e9.docx]

**Extended Data Table 1.** Subject metadata and histology series (P56, C5BL/6J mice)

| Subject ID | Sex | Section Plane | Skull | Radiology | Histology |
| --- | --- | --- | --- | --- | --- |
| MD961 | F | Coronal | + | In vivo, ex vivo MRIs, ex vivo CT | Nissl, myelin, 10mm alternate sections |
| MD962 | F | Transverse | + | In vivo, ex vivo MRIs, ex vivo CT | Nissl, myelin, 10mm alternate sections |
| MD963 | F | Sagittal | + | In vivo, ex vivo MRIs, ex vivo CT | Nissl, myelin, 10mm alternate sections |
| MD585 | M | Sagittal | - | N/A | Nissl, 20mm serial sections |
| MD634 | M | Coronal | - | N/A | Nissl, 20mm serial sections |
| MD636 | M | Transverse | - | N/A | Nissl, 20mm serial sections |

**Extended Data Table 2.** Current mouse brain atlases with histological data.

| **Atlas reference** | **MRI** | **Histology** | **Plate number** | **Mouse strain** | **Notes** | **Limitations** |
| --- | --- | --- | --- | --- | --- | --- |
| Patrick Hof  Comparative cytoarchitectonic atlas (2000) 1 | - | +  Nissl and myelin | coronal series of 49 levels Nissl and 6 levels myelin | C57BL6 and 129SV mouse | Print atlas | CD-ROMs |
| Paxinos and Franklin 2001. 2  Paxinos and Franklin 2019 3 | - | +  Nissl, AChE | 100 coronal plates  32 sagittal plates | C57BL/6J | Textbook | No MRI images |
| - | +  Nissl, AChE, IHC for Parvalbumin | 100 coronal plates  32 sagittal plates  30 horizontal plates | C57BL/6J | 5th edition |  |
| MacKenzie-Graham et al. 2004 4 | +  60 μm | + |  | C57BL/6J | MRM, blockface imaging, histology and IHC |  |
| Kovacevic et al. 2005 5 | +  60 μm | - |  | 129S1/SvImJ | Nine excised brains of 8 week old 129S1/SvImJ male mice | No histological data |
| Ma et al. 2005 6 | +  T2  47 μm isotropic resolution | - |  | C57BL/6J |  | No histological data |
| Carson et al. transcriptomic atlas 2005 7 | ? |  | 11 saggital sections Nissl stained |  |  |  |
| Badea et al. 2007 8 | +  T1-weighted  image 21.5-μm resolution; T2 image at 43 μm resolution | - |  | C57BL/6J | Six adult mice, about 9 weeks old | No histological data |
| Sharief et al. 2008 9 | +  isotropic 43 μm T1- and T2-weighted | - |  | C57BL/6J |  | No histological data |
| Dorr et al. 2008 10 | +  32 μm isotropic resolution T2-weighted | - |  | C57BL/6J | Forty 12-week-old mice | No histological data |
| Dong et al. 2008. The Allen Reference Atlas 11  Oh et al. 2014 12  Wang et al. 2020 13 | - | Nissl | 132 coronal annotated sections in detail, 21 sagittal sections | C57BL/6J | Print atlas  Allen Mouse Brain Common Coordinate Framework (CCFv1) | One brain  2D mouse brain atlas; 100 um spacing;  No MRI data |
|  |  |  | C57BL/6J | Allen Mouse Brain Common Coordinate Framework (CCFv2) | Meso connectome |
|  | + | Histology, immunohistochemistry (IHC), in-situ hybridization (ISH) | C57BL/6J | Allen Mouse Brain Common Coordinate Framework (CCFv3) | Averaged template |
| Meyer et al.  2017 14 | +  MRI in-vivo 100 um | - |  | C57BL/6J | 60 mice | No histological data |
| Chon et al. 2019 15 | + | + |  |  | Reconstructed Nissls from Paxinos atlas;  Allen onotolgy |  |
| Staeger et al. 2020 16 | 9.4 T but not used in atlas | DAPI | 100 um sections to 3 D volume | C57BL/6 | 12 brains @0.86 x 0.86 um resolution |  |
| Ortiz et al. 202017 | - | - | ST spots array hybridization | C57BL/6J | Spatial transcriptomics |  |
| Sidman et al.  <https://www.hms.harvard.edu/research/brain/atlas.html> 18 | - | +  Nissl and myelin | 56 Nissl and 63 myelin section | C57BL/6J | Coronal sections | No MRI images |

**Extended Data Table 3**: Existing MRI atlases of the mouse brain.

| **Author (s)** | **Mouse strain(s)** | **Imaging modalities** | **Brain regions covered** | **# of structures** | **Sampling Resolution (µm³)** | **In or Ex Vivo** | **MRI contrast** | **Ages** |
| --- | --- | --- | --- | --- | --- | --- | --- | --- |
| MacKenzie-Graham et al., 200319 | C57BL/6 | MRI and histology | Whole brain | 70 | 60 | ex vivo | Diffusion weighted | P100 |
| MacKenzie-Graham et al., 20044 | C57BL/6 | MRI and histology | Whole brain | 70 | 60 | ex vivo | Diffusion weighted | P100 |
| Kovacevic et al., 20055 | 129SI/Svlm | MRI | Whole brain | 42 | 60 | ex vivo | T2-weighted | P63 |
| Ma et al., 20056 | C57BL/6 | MRI | Whole brain | 20 | 47 | ex vivo | T2-weighted, diffusion tensor MRI | P84-P98 |
| Lee et al., 201220 | C57BL/6 | MRI | Whole brain | 13 | 40 | ex vivo | T2-weighted | P0 |
| Ali et al., 200521 | C57BL/6 | MR | Whole brain | 21 | 90 | ex vivo | T2-weighted | P63 |
| Chen et al., 200622 | C57BL/6, 129SI/Svlm, CD1 | MR | Whole brain | 42 | 60 | ex vivo | T2-weighted | P56 |
| Bock et al., 200623 | cdf/cdf, cdf/+ | MR and histology | Cerebrum & cerebellum | 5 | 156 | in vivo | T1-weighted | P77 |
| Johnson et al., 200724 | C57BL/6 | MR | Whole brain | 33 | 43 | ex vivo | T1, T2-weighted | P63-84 |
| Dorr et al., 200725 | CBA | MR and CT | Whole brain & vasculature | 26 | 32 | ex vivo | T2-weighted | P84 |
| Badea et al., 2007 a & b 8 | C57BL/6 | MR | Whole brain | 33 | 43 | ex vivo | T1, T2-weighted | P63 |
| Sharief et al., 20089 | C57BL/6 | MR | Whole brain | 33 | 43 | ex vivo | T1, T2-weighted | P63 |
| And BXD |  |  |  |
| Ma et al., 200826 | C57BL/6 | MR | whole brain | 20 | 100 | in vivo | T2-weighted | P84-P98 |
| Dorr et al., 200810 | C57BL/6 | MR | Whole brain | 62 | 32 | ex vivo | T2-weighted | P84 |
| Aggarwal et al., 200927 | C57BL/6 | MR and CT | Whole brain | 62 | 32 | ex vivo, in vivo for P140-160 | T2-weighted, diffusion tensor MRI | P7, P14, P21, P28, P63, P140-160 |
| Richards et al., 201128 | C57BL/6 | MR | Hippocampus | 40 | 30 | ex vivo | T2*-weighted | P84 |
| Chuang et al., 201229 | C57BL/6 | MR | Developing brain (cortex, hippocampus, cerebellum, and white matter tracts) | 62 | 80 to 125 | ex vivo | T2-weighted, diffusion tensor MRI | E12-P80 |
| Ullmann et al., 201330 | C57BL/6 | MR | Neocortex | 74 | 15 | ex vivo | T2*-weighted | P84 |
| Steadman et al., 201431 | NL3 KI | MR | Cerebellum | 39 | 56 | ex vivo | T2-weighted | NA |
| Szulc et al., 201532 | FVB/N | MR | Developing brain (whole brain) |  | 100 | in vivo | T1-weighted | P1-P11 |
| Kronman et al., 202333 | C57BL/6 | MR and 3D Light Microscopy | Developing brain (whole brain) | 270 | 100 | ex vivo | T2-weighted, diffusion tensor MRI | E11-P56 |

1. *Comparative Cytoarchitectonic Atlas of the C57BL/6 and 129/Sv Mouse Brains*. (Elsevier, Amsterdam, 2000).

2. Paxinos, G., Franklin, K. B. J. & Franklin, K. B. J. *The Mouse Brain in Stereotaxic Coordinates*. (Academic Press, San Diego, 2001).

3. Paxinos, G. & Franklin, K. B. J. *Paxinos and Franklin’s The Mouse Brain in Stereotaxic Coordinates / George Paxinos, Neuroscience Research Australia, the University of New South Wales, Sydney, Australia, Keith B.J. Franklin, Department of Psychology, McGill University, Montreal, Quebec, Canada..* *Paxinos and Franklin’s The mouse brain in stereotaxic coordinates* (Academic Press, an imprint of Elsevier, London, 2019).

4. MacKenzie-Graham, A. *et al.* A multimodal, multidimensional atlas of the C57BL/6J mouse brain. *J. Anat.* **204**, 93–102 (2004).

5. Kovacevic, N. *et al.* A Three-dimensional MRI Atlas of the Mouse Brain with Estimates of the Average and Variability. *Cereb. Cortex* **15**, 639–645 (2005).

6. Ma, Y. *et al.* A three-dimensional digital atlas database of the adult C57BL/6J mouse brain by magnetic resonance microscopy. *Neuroscience* **135**, 1203–1215 (2005).

7. Carson, J. P. *et al.* A Digital Atlas to Characterize the Mouse Brain Transcriptome. *PLoS Comput. Biol.* **1**, e41 (2005).

8. Badea, A. *et al.* Morphometric analysis of the C57BL/6J mouse brain. *NeuroImage* **37**, 683–693 (2007).

9. Sharief, A. A., Badea, A., Dale, A. M. & Johnson, G. A. Automated segmentation of the actively-stained mouse brain using multi-spectral MR microscopy. *NeuroImage* **39**, 136–145 (2008).

10. Dorr, A. E., Lerch, J. P., Spring, S., Kabani, N. & Henkelman, R. M. High resolution three-dimensional brain atlas using an average magnetic resonance image of 40 adult C57Bl/6J mice. *NeuroImage* **42**, 60–69 (2008).

11. Dong, H. W. *The Allen Reference Atlas: A Digital Color Brain Atlas of the C57Bl/6J Male Mouse*. ix, 366 (John Wiley & Sons Inc, Hoboken, NJ, US, 2008).

12. Oh, S. W. *et al.* A mesoscale connectome of the mouse brain. *Nature* **508**, 207–214 (2014).

13. Wang, Q. *et al.* The Allen Mouse Brain Common Coordinate Framework: A 3D Reference Atlas. *Cell* **181**, 936 (2020).

14. Meyer, C. E. *et al.* In vivo magnetic resonance images reveal neuroanatomical sex differences through the application of voxel-based morphometry in C57BL/6 mice. *NeuroImage* **163**, 197–205 (2017).

15. Chon, U., Vanselow, D. J., Cheng, K. C. & Kim, Y. Enhanced and unified anatomical labeling for a common mouse brain atlas. *Nat. Commun.* **10**, 5067–5067 (2019).

16. Stæger, F. F. *et al.* A three-dimensional, population-based average of the C57BL/6 mouse brain from DAPI-stained coronal slices. *Sci. Data* **7**, 235 (2020).

17. Ortiz, C. *et al.* Molecular atlas of the adult mouse brain. *Sci. Adv.* **6**, eabb3446 (2020).

18. High Resolution Mouse Brain Atlas - Introduction. http://www.hms.harvard.edu/research/brain/intro.html.

19. MacKenzie-Graham, A. *et al.* The informatics of a C57BL/6J mouse brain atlas. *Neuroinformatics* **1**, 397–410 (2003).

20. Lee, J. *et al.* The contribution of myelin to magnetic susceptibility-weighted contrasts in high-field MRI of the brain. *Neuroimage* **59**, 3967–3975 (2012).

21. Ali, A. A., Dale, A. M., Badea, A. & Johnson, G. A. Automated segmentation of neuroanatomical structures in multispectral MR microscopy of the mouse brain. *NeuroImage* **27**, 425–435 (2005).

22. Chen, X. J. *et al.* Neuroanatomical differences between mouse strains as shown by high-resolution 3D MRI. *NeuroImage* **29**, 99–105 (2006).

23. Bock, N. A. *et al.* In Vivo Magnetic Resonance Imaging and Semiautomated Image Analysis Extend the Brain Phenotype for cdf/cdf Mice. *J. Neurosci.* **26**, 4455–4459 (2006).

24. Johnson, G. A. *et al.* High-throughput morphologic phenotyping of the mouse brain with magnetic resonance histology. *NeuroImage* **37**, 82–89 (2007).

25. Dorr, A., Sled, J. G. & Kabani, N. Three-dimensional cerebral vasculature of the CBA mouse brain: a magnetic resonance imaging and micro computed tomography study. *NeuroImage* **35**, 1409–1423 (2007).

26. Ma, Y. *et al.* In Vivo 3D Digital Atlas Database of the Adult C57BL/6J Mouse Brain by Magnetic Resonance Microscopy. *Front. Neuroanat.* **2**, 1 (2008).

27. Aggarwal, N. T. *et al.* The Association of Magnetic Resonance Imaging Measures With Cognitive Function in a Biracial Population Sample. *Arch. Neurol.* **67**, 475–482 (2010).

28. Richards, K. *et al.* Segmentation of the mouse hippocampal formation in magnetic resonance images. *NeuroImage* **58**, 732–740 (2011).

29. Chuang, N. *et al.* An MRI-based atlas and database of the developing mouse brain. *NeuroImage* **54**, 80–89 (2011).

30. Ullmann, J. F. P., Watson, C., Janke, A. L., Kurniawan, N. D. & Reutens, D. C. A segmentation protocol and MRI atlas of the C57BL/6J mouse neocortex. *NeuroImage* **78**, 196–203 (2013).

31. Steadman, P. E. *et al.* Genetic effects on cerebellar structure across mouse models of autism using a magnetic resonance imaging atlas. *Autism Res. Off. J. Int. Soc. Autism Res.* **7**, 124–137 (2014).

32. Szulc, K. U. *et al.* 4D MEMRI atlas of neonatal FVB/N mouse brain development. *NeuroImage* **118**, 49–62 (2015).

33. Kronman, F. A. *et al.* Developmental Mouse Brain Common Coordinate Framework. *BioRxiv Prepr. Serv. Biol.* 2023.09.14.557789 (2023) doi:10.1101/2023.09.14.557789.
