# Supplementary material for: 3D multimodal histological atlas and coordinate framework for the mouse brain and head
Source: Research Square preprint supplement (doi:10.21203/rs.3.rs-6387518/v1), 2025-05-14
Supplement: Supplementary file 5 [file 729bf871fb2be1a66d06c545.docx]

**Downloadable Output Dataset Descriptions**. Downloadable reference datasets associated with the current mouse whole head atlas resource are listed and described below:

1. *In Vivo* Averaged Reference Space Volume: This template volume is the backbone of the reference atlas resource, averaging all *in vivo* MRI from the mice used in the current manuscript. The coordinate space was defined using CT scans by fitting Bregma, Lambda, and Midline sutures, finding the intersection point between Bregma and Lambda sutures to define the origin, and defining a tangent plane orthogonal to the fit origin to define orientation. This volume is available at resolutions up to 20μm voxels, isotropic.
2. Reconstructed Nissl Volumes: Six separate Nissl volumes from six mice were reconstructed using 20μm isotropic voxels. Three datasets cover the whole head, and three includes the whole brain plus the lower brainstem and upper spinal cord. Nissl microscopy series were registered and reconstructed in reference space, with all volumes mapped to the *in vivo* reference coordinate system with Bregma as the origin.
3. Reconstructed Myelin Volumes: Three separate Myelin volumes from three mice were reconstructed using 20μm isotropic voxels. All datasets cover the whole head. Myelin microscopy series were registered and reconstructed in reference space, with all volumes mapped to the *in vivo* reference coordinate system with Bregma as the origin.
4. *In Vivo* MRI Volumes: Twelve *in vivo* volumetric MRI (T2w) datasets are upsampled and reconstructed at the resolution of the Nissl and Myelin Microscopy volumes (20μm isotropic voxels).
5. *Ex Vivo* MRI Volumes: Twelve *ex vivo* volumetric MRI (T2w) and DWI (diffusion weighted images) datasets are upsampled and reconstructed at the resolution of the Nissl and Myelin Microscopy volumes (20μm isotropic voxels).
6. Brain Region Segmentations: Brain region compartments originate from version 3 of the Allen Institute Mouse Reference Atlas but were corrected and updated as described in the manuscript. These segmentations are mapped to the reference coordinate space with Bregma as the origin and are available for download wholistically as a segmented volume (resolved at 20μm isotropic voxels), and provide a starting point for refining annotations.
