# Supplementary material for: 3D multimodal histological atlas and coordinate framework for the mouse brain and head
Source: Research Square preprint supplement (doi:10.21203/rs.3.rs-6387518/v1), 2025-05-14
Supplement: Supplementary file 7 [file e931dddd8631f0b889cbc3c4.docx]

**Mouse brain atlases in the literature**. We provide a list of existing mouse brain atlases in **Extended Data Table 2**. The techniques used to create these atlases vary, as do the levels of detail and resolution provided. The atlases are based on different methods such as MRI, histology, and immunohistochemistry, and are listed chronologically, with updated versions grouped together. Historically, the most widespread set of histological atlases are the stereotaxic atlases by Paxinos and Franklin, published in five editions. Many subsequent histological atlases are based on their data, making this atlas possibly the most commonly used histological print atlas of the mouse brain.

The early 2000s saw the advent of MRI mouse atlases with varying resolutions. The number of histological sections and stains varies across atlases, but none offer serial sections with the density presented in the current manuscript, nor do they simultaneously provide all three planes of section. For example, the Paxinos and Franklin atlas (2001) includes 100 coronal plates and 32 sagittal plates, while the Dong et al. (2008) atlas provides 132 coronal annotated sections in detail and 21 sagittal sections. The Paxinos and Franklin 5th edition (2019) atlas includes Nissl, AChE, and IHC for parvalbumin, consisting of 100 coronal plates, 32 sagittal plates, and 30 horizontal plates.

Some newer atlases, such as the Allen Mouse Brain Common Coordinate Framework (CCFv3) by Wang et al. (2020) and the *in vivo* MRI atlas by Meyer et al. (2017), use a combination of imaging techniques and provide more detailed and comprehensive data than earlier atlases. For example, the Allen Mouse Brain CCFv3 includes histology, immunohistochemistry, and in situ hybridization data in a 3D averaged template, while the Meyer et al. dataset includes *in vivo* MRI data with a resolution of 100 um.

In terms of limitations, some atlases may have limited applicability for certain research questions due to their focus on a specific brain regions or types of analysis. For instance, some atlases are based on a limited number of brains, while others are constrained by the resolution of the imaging techniques used. Overall, choosing the appropriate mouse brain atlas depends on the specific research question and the required level of detail and resolution. It may be necessary to consult multiple atlases or combine data from different atlases to achieve the desired level of detail and specificity.
